# Supplementary material
Source: publisher figshare collection journal article supplement (https://sage.figshare.com/ndownloader/files/16188266)
Supplement: Supplementary file 1 [file 16188266]

**Table S1. CPV Cases**

| No | Name        | Summary Description                                                                                                                                                                                                                                                 | Desired Change in Hypoglycemic Treatment                                            |
|----|-------------|---------------------------------------------------------------------------------------------------------------------------------------------------------------------------------------------------------------------------------------------------------------------|-------------------------------------------------------------------------------------|
| 1  | Ms. Martin  | 69/F, comes in to refill her diabetes medications. She eats numerous small meals throughout the day. Despite her HbA1c being fairly well-controlled at 7.6%, she complains that the episodes of “pins and needles” sensation in her feet have become more frequent. | Increase in the dose of her current diabetes regimen, or addition of another OHA.   |
| 2  | Mr. Shah    | 65/M, a known diabetic who is attempting to lose weight, complains of morning headaches and night sweats that began two weeks ago. Diagnostic evaluation shows HbA1c of 7.5%.                                                                                       | Discontinue the PM dose of sulfonylurea, or shift it to another drug class.         |
| 3  | Mr. Crasner | 73/M, returns to clinic for an unscheduled appointment due to a recent history of falls. Ten days ago, his basal insulin was increased from 35 units daily to 45 units daily because an HbA1c done three weeks ago was 8.2%.                                        | Reduce the basal insulin dose and increase the dose of his Metformin.               |
| 4  | Mr. Venice  | 56/M, a known diabetic who had received an epidural steroid injection for sciatica two weeks ago, is seen in the office for his scheduled 3-month follow-up Current HbA1c is 6.7%.                                                                                  | Increase the dose of his Metformin or shift his sulfonylurea to another drug class. |
| 5  | Mr. Lenny   | 52/M, returns to the office for a follow-up visit. He received 3 units of pRBC transfusion when he was recently admitted 3 weeks ago for an ORIF of the left tibia following an MVA. Current evaluation shows an HbA1c of 6.6%.                                     | Resume his previous OHA or start an OHA from another drug class                     |
| 6  | Ms. Jenna   | 39/F, is seen for her scheduled follow-up for diabetes. She is currently 14 weeks pregnant, and an evaluation shows an HbA1c of 6.9%.                                                                                                                               | Increase her lispro dose or adjust her insulin sliding scale tier.                  |

**Table S2. Provider Study Demographic Distribution vs National Targets**

| Criteria                |                    | National Target | Study Distribution |
|-------------------------|--------------------|-----------------|--------------------|
| <b>Training</b>         | Family Medicine    | 60%             | 47%                |
|                         | Internal Medicine  | 40%             | 53%                |
| <b>Sex</b>              | Female             | 40%             | 21%                |
|                         | Male               | 60%             | 79%                |
| <b>Age</b>              | Less than 40 years | 30%             | 5%                 |
|                         | 40 – 54 years      | 35%             | 60%                |
|                         | 56 years and older | 35%             | 35%                |
| <b>Region</b>           | Northeast          | 20%             | 22%                |
|                         | Midwest            | 20%             | 24%                |
|                         | West               | 25%             | 21%                |
|                         | South              | 35%             | 34%                |
| <b>Practice Setting</b> | Urban/Suburban     | 80%             | 80%                |
|                         | Rural              | 20%             | 20%                |
